# Supplementary material for: Multi-view light-sheet imaging and tracking with the MaMuT software reveals the cell lineage of a direct developing arthropod limb
Source: eLife. 2018 Mar 29;7:e34410. doi: 10.7554/eLife.34410 (PMC5929908; doi:10.7554/eLife.34410)
Supplement: Figure 5—source data 1. [file elife-34410-fig5-data1.xlsx]

## Sheet: Limb#1
Limb#1
Cell	% birth time difference
E4c3	0
E4d3	0
E4c4	1.68067
E4c5	1.68067
E4d4	1.68067
E4d5	1.68067
E4b3	8.40336
E4b4	13.4454
E4b5	15.9664
E5a4	31.9328
E5b4	31.9328
E4b6	32.7731
E4c6	33.6134
E4d6	33.6134
E5a3	36.1345
E5b3	36.1345
E5a6	56.3025
E5b6	56.3025
E5a5	58.8235
E5b5	58.8235
E4b7	63.0252
E4c9	63.0252
E4d9	63.0252
E5a7	63.8655
E5b7	63.8655
E4c8	65.5462
E4d8	65.5462
E4c7	71.4286
E4d7	71.4286
E5a8	77.3109
E5b8	77.3109
E4b8	92.437
E5a9	100
E5b9	100

## Sheet: Limb#2
Limb#2
Cell	% birth time difference
E4c3	0
E4d3	0
E4c4	12.766
E4d4	12.766
E4b3	14.8936
E4b4	17.0213
E4c6	19.1489
E4d6	19.1489
E4c7	19.1489
E4d7	19.1489
E4c5	27.6596
E4d5	27.6596
E4b5	31.9149
E5a4	38.2979
E5b4	38.2979
E5a3	38.2979
E5b3	38.2979
E4b6	42.5532
E4b7	42.5532
E5a5	53.1915
E5b5	53.1915
E5a7	57.4468
E5b7	57.4468
E4c8	61.7021
E4d8	61.7021
E4c9	63.8298
E4d9	63.8298
E5a6	72.3404
E5b6	72.3404
E5a8	74.4681
E5b8	74.4681
E4b8	100
E5a9	100
E5b9	100

## Sheet: Average
Average Limb
Cell	% birth time difference
E4c3	0
E4d3	0
E4c4	4.81928
E4d4	4.81928
E4c5	9.03614
E4d5	9.03614
E4b3	10.241
E4b4	14.4578
E4b5	20.4819
E4c6	29.5181
E4d6	29.5181
E5a4	33.7349
E5b4	33.7349
E4b6	35.5422
E5a3	36.747
E5b3	36.747
E4c7	56.6265
E4d7	56.6265
E4b7	57.2289
E5a5	57.2289
E5b5	57.2289
E5a6	60.8434
E5b6	60.8434
E5a7	62.0482
E5b7	62.0482
E4c9	63.253
E4d9	63.253
E4c8	64.4578
E4d8	64.4578
E5a8	76.506
E5b8	76.506
E4b8	94.5783
E5a9	100
E5b9	100
