# Supplementary material for: Multi-view light-sheet imaging and tracking with the MaMuT software reveals the cell lineage of a direct developing arthropod limb
Source: eLife. 2018 Mar 29;7:e34410. doi: 10.7554/eLife.34410 (PMC5929908; doi:10.7554/eLife.34410)
Supplement: Figure 7—source data 1. [file elife-34410-fig7-data1.xlsx]

## Sheet: Limb#1 distances
	L1-E4b7	L1-E4c9	L1-E4d7	L1-E4c7	L1-E5a8	L1-E4d9	L1-E4d8	L1-E5b5	L1-E5b6	L1-E5b7	L1-E5a6	L1-E5a5	L1-E5a7	L1-E4c8	L1-E5a4	L1-E5a3	L1-E5b4	L1-E5b3	L1-E5b8	L1-E5b9	L1-E4b8	L1-E4b6	L1-E5a9	L1-E4b4	L1-E4b3	L1-E4b5	L1-E4d4	L1-E4d5	L1-E4c4	L1-E4c5	L1-E4d6	L1-E4c3	L1-E4c6	L1-E4d3
L1-E4b7	0	0.09469	0.15093	0.1714	0.16335	0.19195	0.12619	0.22227	0.15159	0.17132	0.15812	0.16077	0.15118	0.13329	0.25957	0.24313	0.1851	0.17148	0.17696	0.26609	0.38115	0.37515	0.366	0.122	0.5	0.45406	0.36056	0.42391	0.31519	0.29319	0.28053	0.25845	0.27231	0.52707
L1-E4c9	0.09469	0	0.1631	0.16541	0.18852	0.09966	0.24658	0.23614	0.18847	0.18682	0.13329	0.17773	0.10889	0.10093	0.19365	0.21522	0.28048	0.12303	0.24014	0.23474	0.44022	0.37915	0.36617	0.39793	0.45496	0.46134	0.36725	0.38059	0.28249	0.27042	0.32489	0.32232	0.24475	0.52724
L1-E4d7	0.15093	0.1631	0	0.06755	0.08182	0.10864	0.12097	0.13293	0.10663	0.10006	0.20125	0.21075	0.15413	0.16364	0.25475	0.30133	0.25248	0.27123	0.24159	0.26633	0.34442	0.32526	0.26351	0.36024	0.39066	0.40417	0.30324	0.3748	0.34599	0.31714	0.24193	0.23445	0.21088	0.43778
L1-E4c7	0.1714	0.16541	0.06755	0	0.09914	0.08014	0.15103	0.1523	0.11121	0.08819	0.22884	0.24451	0.16746	0.18107	0.24605	0.32413	0.26301	0.25967	0.24014	0.26351	0.35392	0.34792	0.27028	0.39676	0.44263	0.42682	0.31691	0.3734	0.36674	0.34234	0.28995	0.27403	0.20571	0.44197
L1-E5a8	0.16335	0.18852	0.08182	0.09914	0	0.13407	0.13818	0.15466	0.12672	0.11028	0.19258	0.17496	0.13962	0.15652	0.23074	0.2554	0.26352	0.29095	0.19921	0.28149	0.28971	0.32398	0.23483	0.37774	0.43732	0.40288	0.29092	0.38851	0.32061	0.303	0.20212	0.22935	0.20869	0.4355
L1-E4d9	0.19195	0.09966	0.10864	0.08014	0.13407	0	0.1839	0.19176	0.16052	0.13258	0.18569	0.2404	0.17465	0.15128	0.2142	0.31283	0.23836	0.22269	0.29494	0.25529	0.36625	0.37258	0.30042	0.39206	0.444	0.45477	0.33848	0.38368	0.34722	0.30638	0.33927	0.3028	0.21598	0.47998
L1-E4d8	0.12619	0.24658	0.12097	0.15103	0.13818	0.1839	0	0.11121	0.14408	0.16381	0.13946	0.11814	0.1202	0.11018	0.2707	0.25016	0.24349	0.26995	0.21822	0.35803	0.25529	0.19669	0.22096	0.32396	0.35222	0.30847	0.31485	0.44635	0.28249	0.24988	0.25194	0.16924	0.24886	0.50669
L1-E5b5	0.22227	0.23614	0.13293	0.1523	0.15466	0.19176	0.11121	0	0.08384	0.11014	0.22477	0.17017	0.13565	0.20598	0.3813	0.35993	0.31504	0.33348	0.23578	0.30847	0.25915	0.19562	0.14811	0.28674	0.3094	0.27452	0.33955	0.48235	0.3487	0.32697	0.28938	0.23935	0.3124	0.52852
L1-E5b6	0.15159	0.18847	0.10663	0.11121	0.12672	0.16052	0.14408	0.08384	0	0.04932	0.24121	0.24743	0.20633	0.18132	0.33362	0.37143	0.23121	0.25622	0.21112	0.25915	0.366	0.26301	0.24674	0.21277	0.23543	0.34192	0.36421	0.43139	0.41774	0.39437	0.2976	0.28702	0.29431	0.494
L1-E5b7	0.17132	0.18682	0.10006	0.08819	0.11028	0.13258	0.16381	0.11014	0.04932	0	0.28724	0.28031	0.20633	0.19776	0.33691	0.4076	0.22792	0.28417	0.21934	0.26737	0.33313	0.30575	0.23578	0.21934	0.242	0.38466	0.34941	0.41331	0.43418	0.4141	0.3124	0.28867	0.28609	0.47427
L1-E5a6	0.15812	0.13329	0.20125	0.22884	0.19258	0.18569	0.13946	0.22477	0.24121	0.28724	0	0.08159	0.08227	0.08485	0.11694	0.09734	0.18055	0.1565	0.28302	0.31461	0.30228	0.2182	0.28576	0.30343	0.33757	0.34971	0.29054	0.31637	0.19638	0.18186	0.24202	0.19907	0.18385	0.48065
L1-E5a5	0.16077	0.17773	0.21075	0.24451	0.17496	0.2404	0.11814	0.17017	0.24743	0.28031	0.08159	0	0.08493	0.10033	0.20633	0.12756	0.25992	0.18518	0.29253	0.38165	0.30357	0.2162	0.25691	0.32351	0.37858	0.3362	0.31829	0.36245	0.21401	0.19886	0.20743	0.19905	0.22935	0.49027
L1-E5a7	0.15118	0.10889	0.15413	0.16746	0.13962	0.17465	0.1202	0.13565	0.20633	0.20633	0.08227	0.08493	0	0.08987	0.16181	0.15496	0.2065	0.18427	0.25143	0.34878	0.29946	0.26716	0.22403	0.3329	0.36899	0.35264	0.27308	0.33643	0.20716	0.1968	0.23757	0.20795	0.1999	0.47862
L1-E4c8	0.13329	0.10093	0.16364	0.18107	0.15652	0.15128	0.11018	0.20598	0.18132	0.19776	0.08485	0.10033	0.08987	0	0.1792	0.14932	0.18929	0.15359	0.22532	0.29664	0.26787	0.2405	0.26916	0.279	0.32918	0.372	0.33263	0.34093	0.24031	0.2259	0.24824	0.25903	0.17352	0.50934
L1-E5a4	0.25957	0.19365	0.25475	0.24605	0.23074	0.2142	0.2707	0.3813	0.33362	0.33691	0.11694	0.20633	0.16181	0.1792	0	0.09863	0.11248	0.13786	0.26804	0.23524	0.24757	0.20376	0.28721	0.24109	0.25135	0.2991	0.29982	0.28822	0.24662	0.23088	0.25893	0.27911	0.15325	0.46906
L1-E5a3	0.24313	0.21522	0.30133	0.32413	0.2554	0.31283	0.25016	0.35993	0.37143	0.4076	0.09734	0.12756	0.15496	0.14932	0.09863	0	0.17516	0.12142	0.26256	0.29278	0.23113	0.17746	0.30913	0.25401	0.28286	0.28595	0.36088	0.29526	0.21844	0.22267	0.24132	0.31258	0.19024	0.52014
L1-E5b4	0.1851	0.28048	0.25248	0.26301	0.26352	0.23836	0.24349	0.31504	0.23121	0.22792	0.18055	0.25992	0.2065	0.18929	0.11248	0.17516	0	0.0696	0.16343	0.14844	0.18543	0.17039	0.24014	0.14548	0.13989	0.19998	0.35697	0.38573	0.36674	0.34953	0.30228	0.31719	0.22009	0.50978
L1-E5b3	0.17148	0.12303	0.27123	0.25967	0.29095	0.22269	0.26995	0.33348	0.25622	0.28417	0.1565	0.18518	0.18427	0.15359	0.13786	0.12142	0.0696	0	0.17584	0.17592	0.19236	0.17239	0.26351	0.1442	0.16874	0.23485	0.40004	0.35745	0.3259	0.31349	0.26658	0.35592	0.21362	0.53823
L1-E5b8	0.17696	0.24014	0.24159	0.24014	0.19921	0.29494	0.21822	0.23578	0.21112	0.21934	0.28302	0.29253	0.25143	0.22532	0.26804	0.26256	0.16343	0.17584	0	0.23707	0.17954	0.16455	0.24384	0.1702	0.13861	0.06318	0.40602	0.48854	0.42503	0.41262	0.3301	0.31349	0.29448	0.58074
L1-E5b9	0.26609	0.23474	0.26633	0.26351	0.28149	0.25529	0.35803	0.30847	0.25915	0.26737	0.31461	0.38165	0.34878	0.29664	0.23524	0.29278	0.14844	0.17592	0.23707	0	0.23014	0.18518	0.18775	0.2237	0.17156	0.29614	0.40473	0.44068	0.50183	0.48667	0.39319	0.44508	0.36853	0.51644
L1-E4b8	0.38115	0.44022	0.34442	0.35392	0.28971	0.36625	0.25529	0.25915	0.366	0.33313	0.30228	0.30357	0.29946	0.26787	0.24757	0.23113	0.18543	0.19236	0.17954	0.23014	0	0.11121	0.07269	0.31822	0.2743	0.21806	0.41295	0.50232	0.46484	0.45791	0.33155	0.35056	0.34799	0.63973
L1-E4b6	0.37515	0.37915	0.32526	0.34792	0.32398	0.37258	0.19669	0.19562	0.26301	0.30575	0.2182	0.2162	0.26716	0.2405	0.20376	0.17746	0.17039	0.17239	0.16455	0.18518	0.11121	0	0.13715	0.28181	0.25186	0.13151	0.41352	0.48235	0.42432	0.40095	0.27459	0.30017	0.29596	0.57455
L1-E5a9	0.366	0.36617	0.26351	0.27028	0.23483	0.30042	0.22096	0.14811	0.24674	0.23578	0.28576	0.25691	0.22403	0.26916	0.28721	0.30913	0.24014	0.26351	0.24384	0.18775	0.07269	0.13715	0	0.36746	0.37696	0.2166	0.3704	0.45567	0.42777	0.42632	0.32462	0.29157	0.32736	0.5643
L1-E4b4	0.122	0.39793	0.36024	0.39676	0.37774	0.39206	0.32396	0.28674	0.21277	0.21934	0.30343	0.32351	0.3329	0.279	0.24109	0.25401	0.14548	0.1442	0.1702	0.2237	0.31822	0.28181	0.36746	0	0.05214	0.20291	0.37477	0.40132	0.35503	0.33049	0.27927	0.28067	0.25344	0.50526
L1-E4b3	0.5	0.45496	0.39066	0.44263	0.43732	0.444	0.35222	0.3094	0.23543	0.242	0.33757	0.37858	0.36899	0.32918	0.25135	0.28286	0.13989	0.16874	0.13861	0.17156	0.2743	0.25186	0.37696	0.05214	0	0.17296	0.37837	0.4198	0.37958	0.34936	0.31615	0.30776	0.27916	0.51611
L1-E4b5	0.45406	0.46134	0.40417	0.42682	0.40288	0.45477	0.30847	0.27452	0.34192	0.38466	0.34971	0.3362	0.35264	0.372	0.2991	0.28595	0.19998	0.23485	0.06318	0.29614	0.21806	0.13151	0.2166	0.20291	0.17296	0	0.38229	0.48071	0.4013	0.38122	0.28609	0.30017	0.28774	0.53016
L1-E4d4	0.36056	0.36725	0.30324	0.31691	0.29092	0.33848	0.31485	0.33955	0.36421	0.34941	0.29054	0.31829	0.27308	0.33263	0.29982	0.36088	0.35697	0.40004	0.40602	0.40473	0.41295	0.41352	0.3704	0.37477	0.37837	0.38229	0	0.16619	0.17311	0.17482	0.20945	0.22242	0.22372	0.19327
L1-E4d5	0.42391	0.38059	0.3748	0.3734	0.38851	0.38368	0.44635	0.48235	0.43139	0.41331	0.31637	0.36245	0.33643	0.34093	0.28822	0.29526	0.38573	0.35745	0.48854	0.44068	0.50232	0.48235	0.45567	0.40132	0.4198	0.48071	0.16619	0	0.17961	0.20255	0.28693	0.31494	0.23761	0.24343
L1-E4c4	0.31519	0.28249	0.34599	0.36674	0.32061	0.34722	0.28249	0.3487	0.41774	0.43418	0.19638	0.21401	0.20716	0.24031	0.24662	0.21844	0.36674	0.3259	0.42503	0.50183	0.46484	0.42432	0.42777	0.35503	0.37958	0.4013	0.17311	0.17961	0	0.03695	0.20597	0.15731	0.20467	0.33995
L1-E4c5	0.29319	0.27042	0.31714	0.34234	0.303	0.30638	0.24988	0.32697	0.39437	0.4141	0.18186	0.19886	0.1968	0.2259	0.23088	0.22267	0.34953	0.31349	0.41262	0.48667	0.45791	0.40095	0.42632	0.33049	0.34936	0.38122	0.17482	0.20255	0.03695	0	0.18606	0.13007	0.17827	0.34227
L1-E4d6	0.28053	0.32489	0.24193	0.28995	0.20212	0.33927	0.25194	0.28938	0.2976	0.3124	0.24202	0.20743	0.23757	0.24824	0.25893	0.24132	0.30228	0.26658	0.3301	0.39319	0.33155	0.27459	0.32462	0.27927	0.31615	0.28609	0.20945	0.28693	0.20597	0.18606	0	0.15552	0.11593	0.32851
L1-E4c3	0.25845	0.32232	0.23445	0.27403	0.22935	0.3028	0.16924	0.23935	0.28702	0.28867	0.19907	0.19905	0.20795	0.25903	0.27911	0.31258	0.31719	0.35592	0.31349	0.44508	0.35056	0.30017	0.29157	0.28067	0.30776	0.30017	0.22242	0.31494	0.15731	0.13007	0.15552	0	0.2266	0.38296
L1-E4c6	0.27231	0.24475	0.21088	0.20571	0.20869	0.21598	0.24886	0.3124	0.29431	0.28609	0.18385	0.22935	0.1999	0.17352	0.15325	0.19024	0.22009	0.21362	0.29448	0.36853	0.34799	0.29596	0.32736	0.25344	0.27916	0.28774	0.22372	0.23761	0.20467	0.17827	0.11593	0.2266	0	0.37696
L1-E4d3	0.52707	0.52724	0.43778	0.44197	0.4355	0.47998	0.50669	0.52852	0.494	0.47427	0.48065	0.49027	0.47862	0.50934	0.46906	0.52014	0.50978	0.53823	0.58074	0.51644	0.63973	0.57455	0.5643	0.50526	0.51611	0.53016	0.19327	0.24343	0.33995	0.34227	0.32851	0.38296	0.37696	0

## Sheet: Limb#2 distances
	L2-E5b6	L2-E5b8	L2-E5a9	L2-E4d9	L2-E4c9	L2-E5b7	L2-E5a8	L2-E5a6	L2-E4d8	L2-E5a5	L2-E4c8	L2-E5a7	L2-E4d7	L2-E4b4	L2-E4b3	L2-E4b8	L2-E5b9	L2-E5b4	L2-E5b3	L2-E4b5	L2-E5a4	L2-E5a3	L2-E4b7	L2-E4b6	L2-E5b5	L2-E4d5	L2-E4c4	L2-E4c3	L2-E4d3	L2-E4c7	L2-E4c5	L2-E4d6	L2-E4c6	L2-E4d4
L2-E5b6	0	0.05952	0.18492	0.11746	0.14127	0.08333	0.19683	0.20476	0.18492	0.30476	0.26508	0.31508	0.33254	0.40476	0.17698	0.24048	0.3	0.30952	0.30159	0.28175	0.2127	0.20635	0.18651	0.23016	0.15873	0.36508	0.34127	0.28333	0.37937	0.38095	0.34921	0.4246	0.40317	0.52937
L2-E5b8	0.05952	0	0.1254	0.17698	0.16905	0.14286	0.24841	0.26429	0.24444	0.26905	0.23333	0.2873	0.3127	0.46429	0.11746	0.175	0.25833	0.36905	0.36111	0.34127	0.20873	0.26587	0.24603	0.28968	0.21825	0.38889	0.38492	0.33492	0.34365	0.35317	0.34127	0.39683	0.39127	0.49762
L2-E5a9	0.18492	0.1254	0	0.18452	0.17857	0.22857	0.26786	0.28274	0.25595	0.23988	0.21905	0.25417	0.17738	0.55	0.4256	0.1119	0.19524	0.45476	0.44683	0.42698	0.30357	0.35159	0.33175	0.3754	0.30397	0.31607	0.33393	0.32262	0.30952	0.25357	0.24167	0.30417	0.29762	0.43869
L2-E4d9	0.11746	0.17698	0.18452	0	0.08333	0.08175	0.1131	0.12202	0.07143	0.28155	0.23393	0.29583	0.30238	0.36349	0.33036	0.32619	0.27262	0.26825	0.26032	0.24048	0.18452	0.16508	0.14524	0.18889	0.11746	0.26845	0.25655	0.19464	0.375	0.3131	0.28929	0.31607	0.34524	0.47143
L2-E4c9	0.14127	0.16905	0.17857	0.08333	0	0.12937	0.14881	0.13393	0.1369	0.19821	0.1506	0.22738	0.26369	0.31587	0.24702	0.35595	0.27262	0.22063	0.2127	0.19286	0.13095	0.11746	0.09762	0.14127	0.09365	0.35179	0.33988	0.23929	0.31845	0.35179	0.34286	0.37857	0.3869	0.48929
L2-E5b7	0.08333	0.14286	0.22857	0.08175	0.12937	0	0.16905	0.17698	0.11746	0.29286	0.26905	0.30317	0.33651	0.32143	0.25238	0.3119	0.2881	0.22619	0.21825	0.19841	0.20079	0.12302	0.10317	0.14683	0.0754	0.34127	0.35317	0.25556	0.41508	0.39286	0.36111	0.39286	0.43095	0.53333
L2-E5a8	0.19683	0.24841	0.26786	0.1131	0.14881	0.16905	0	0.02083	0.04762	0.21607	0.18333	0.25714	0.31726	0.3119	0.33631	0.26667	0.18333	0.21667	0.20873	0.20079	0.19048	0.17302	0.16111	0.15714	0.11746	0.30714	0.30714	0.19464	0.375	0.40238	0.38452	0.41429	0.4256	0.46845
L2-E5a6	0.20476	0.26429	0.28274	0.12202	0.13393	0.17698	0.02083	0	0.05655	0.20119	0.16845	0.24226	0.30238	0.2881	0.31548	0.26667	0.18333	0.19286	0.18492	0.17698	0.16964	0.14921	0.1373	0.13333	0.11746	0.32202	0.32202	0.19762	0.36012	0.41429	0.3994	0.41726	0.44048	0.48333
L2-E4d8	0.18492	0.24444	0.25595	0.07143	0.1369	0.11746	0.04762	0.05655	0	0.22798	0.19524	0.26905	0.32917	0.31984	0.33631	0.32024	0.2369	0.2246	0.21667	0.19683	0.19048	0.16111	0.14921	0.14524	0.10556	0.28036	0.29524	0.19167	0.41071	0.37262	0.35476	0.38155	0.40179	0.48631
L2-E5a5	0.30476	0.26905	0.23988	0.28155	0.19821	0.29286	0.21607	0.20119	0.22798	0	0.0377	0.07778	0.10714	0.28889	0.25476	0.35476	0.34286	0.19365	0.18571	0.24524	0.15655	0.25714	0.26111	0.21746	0.24921	0.29643	0.33611	0.27421	0.275	0.24881	0.27063	0.29246	0.29484	0.39921
L2-E4c8	0.26508	0.23333	0.21905	0.23393	0.1506	0.26905	0.18333	0.16845	0.19524	0.0377	0	0.07183	0.12103	0.30873	0.26667	0.3369	0.3131	0.21349	0.22143	0.24921	0.18036	0.2373	0.24127	0.20556	0.22937	0.29444	0.30833	0.23651	0.26508	0.24484	0.26071	0.29246	0.28492	0.38333
L2-E5a7	0.31508	0.2873	0.25417	0.29583	0.22738	0.30317	0.25714	0.24226	0.26905	0.07778	0.07183	0	0.13929	0.34286	0.31071	0.39286	0.3869	0.25556	0.26349	0.30317	0.2006	0.29921	0.30317	0.25952	0.29127	0.25238	0.26939	0.33163	0.27857	0.19626	0.20816	0.23367	0.23776	0.33333
L2-E4d7	0.33254	0.3127	0.17738	0.30238	0.26369	0.33651	0.31726	0.30238	0.32917	0.10714	0.12103	0.13929	0	0.18175	0.18929	0.28929	0.35476	0.20952	0.21746	0.2373	0.15952	0.29286	0.30476	0.28889	0.34841	0.24087	0.26667	0.23651	0.21746	0.14167	0.17937	0.18532	0.21349	0.39524
L2-E4b4	0.40476	0.46429	0.55	0.36349	0.31587	0.32143	0.3119	0.2881	0.31984	0.28889	0.30873	0.34286	0.18175	0	0.10952	0.09762	0.18095	0.09524	0.10317	0.12302	0.16111	0.19841	0.21825	0.1746	0.24603	0.34127	0.37302	0.37063	0.38333	0.2619	0.31349	0.28968	0.32778	0.5254
L2-E4b3	0.17698	0.11746	0.4256	0.33036	0.24702	0.25238	0.33631	0.31548	0.33631	0.25476	0.26667	0.31071	0.18929	0.10952	0	0.15952	0.24286	0.20476	0.2127	0.23254	0.14583	0.28016	0.29206	0.28413	0.3119	0.28929	0.30119	0.29881	0.3244	0.2506	0.24762	0.27738	0.29167	0.41786
L2-E4b8	0.24048	0.175	0.1119	0.32619	0.35595	0.3119	0.26667	0.26667	0.32024	0.35476	0.3369	0.39286	0.28929	0.09762	0.15952	0	0.08333	0.18095	0.19286	0.24048	0.25476	0.33571	0.35357	0.2881	0.31786	0.39524	0.425	0.41071	0.40357	0.35952	0.36548	0.40119	0.40952	0.55357
L2-E5b9	0.3	0.25833	0.19524	0.27262	0.27262	0.2881	0.18333	0.18333	0.2369	0.34286	0.3131	0.3869	0.35476	0.18095	0.24286	0.08333	0	0.20476	0.19286	0.15714	0.21905	0.25238	0.27024	0.20476	0.23452	0.35357	0.36548	0.32738	0.475	0.44286	0.41905	0.45476	0.4631	0.51786
L2-E5b4	0.30952	0.36905	0.45476	0.26825	0.22063	0.22619	0.21667	0.19286	0.2246	0.19365	0.21349	0.25556	0.20952	0.09524	0.20476	0.18095	0.20476	0	0.00794	0.0754	0.07381	0.10317	0.12302	0.07937	0.15079	0.38492	0.44444	0.3746	0.39921	0.34921	0.36905	0.36905	0.41508	0.60079
L2-E5b3	0.30159	0.36111	0.44683	0.26032	0.2127	0.21825	0.20873	0.18492	0.21667	0.18571	0.22143	0.26349	0.21746	0.10317	0.2127	0.19286	0.19286	0.00794	0	0.06746	0.06587	0.09524	0.11508	0.07143	0.14286	0.37698	0.43651	0.36667	0.40714	0.35714	0.37698	0.37698	0.42302	0.59286
L2-E4b5	0.28175	0.34127	0.42698	0.24048	0.19286	0.19841	0.20079	0.17698	0.19683	0.24524	0.24921	0.30317	0.2373	0.12302	0.23254	0.24048	0.15714	0.0754	0.06746	0	0.10159	0.0754	0.09524	0.05159	0.12302	0.30952	0.36905	0.32302	0.43492	0.34524	0.34524	0.34524	0.39127	0.56905
L2-E5a4	0.2127	0.20873	0.30357	0.18452	0.13095	0.20079	0.19048	0.16964	0.19048	0.15655	0.18036	0.2006	0.15952	0.16111	0.14583	0.25476	0.21905	0.07381	0.06587	0.10159	0	0.1373	0.15714	0.11349	0.18492	0.31905	0.36369	0.30179	0.34524	0.29226	0.30417	0.33393	0.34821	0.50714
L2-E5a3	0.20635	0.26587	0.35159	0.16508	0.11746	0.12302	0.17302	0.14921	0.16111	0.25714	0.2373	0.29921	0.29286	0.19841	0.28016	0.33571	0.25238	0.10317	0.09524	0.0754	0.1373	0	0.01984	0.03968	0.05556	0.34524	0.37698	0.29524	0.40714	0.37302	0.37302	0.37302	0.41905	0.57302
L2-E4b7	0.18651	0.24603	0.33175	0.14524	0.09762	0.10317	0.16111	0.1373	0.14921	0.26111	0.24127	0.30317	0.30476	0.21825	0.29206	0.35357	0.27024	0.12302	0.11508	0.09524	0.15714	0.01984	0	0.04365	0.04365	0.34921	0.37698	0.29524	0.41508	0.38492	0.38492	0.38492	0.43095	0.56905
L2-E4b6	0.23016	0.28968	0.3754	0.18889	0.14127	0.14683	0.15714	0.13333	0.14524	0.21746	0.20556	0.25952	0.28889	0.1746	0.28413	0.2881	0.20476	0.07937	0.07143	0.05159	0.11349	0.03968	0.04365	0	0.07143	0.35317	0.40079	0.30714	0.42698	0.38889	0.38889	0.38889	0.43492	0.58889
L2-E5b5	0.15873	0.21825	0.30397	0.11746	0.09365	0.0754	0.11746	0.11746	0.10556	0.24921	0.22937	0.29127	0.34841	0.24603	0.3119	0.31786	0.23452	0.15079	0.14286	0.12302	0.18492	0.05556	0.04365	0.07143	0	0.34524	0.37698	0.25952	0.41905	0.4246	0.39683	0.42857	0.45079	0.58095
L2-E4d5	0.36508	0.38889	0.31607	0.26845	0.35179	0.34127	0.30714	0.32202	0.28036	0.29643	0.29444	0.25238	0.24087	0.34127	0.28929	0.39524	0.35357	0.38492	0.37698	0.30952	0.31905	0.34524	0.34921	0.35317	0.34524	0	0.0372	0.13503	0.22113	0.10417	0.07738	0.0744	0.12589	0.26696
L2-E4c4	0.34127	0.38492	0.33393	0.25655	0.33988	0.35317	0.30714	0.32202	0.29524	0.33611	0.30833	0.26939	0.26667	0.37302	0.30119	0.425	0.36548	0.44444	0.43651	0.36905	0.36369	0.37698	0.37698	0.40079	0.37698	0.0372	0	0.11463	0.21964	0.11161	0.09673	0.08185	0.13333	0.26845
L2-E4c3	0.28333	0.33492	0.32262	0.19464	0.23929	0.25556	0.19464	0.19762	0.19167	0.27421	0.23651	0.33163	0.23651	0.37063	0.29881	0.41071	0.32738	0.3746	0.36667	0.32302	0.30179	0.29524	0.29524	0.30714	0.25952	0.13503	0.11463	0	0.20374	0.21497	0.19626	0.19626	0.23265	0.33673
L2-E4d3	0.37937	0.34365	0.30952	0.375	0.31845	0.41508	0.375	0.36012	0.41071	0.275	0.26508	0.27857	0.21746	0.38333	0.3244	0.40357	0.475	0.39921	0.40714	0.43492	0.34524	0.40714	0.41508	0.42698	0.41905	0.22113	0.21964	0.20374	0	0.24494	0.23899	0.24792	0.25794	0.31799
L2-E4c7	0.38095	0.35317	0.25357	0.3131	0.35179	0.39286	0.40238	0.41429	0.37262	0.24881	0.24484	0.19626	0.14167	0.2619	0.2506	0.35952	0.44286	0.34921	0.35714	0.34524	0.29226	0.37302	0.38492	0.38889	0.4246	0.10417	0.11161	0.21497	0.24494	0	0.03274	0.04167	0.06935	0.2625
L2-E4c5	0.34921	0.34127	0.24167	0.28929	0.34286	0.36111	0.38452	0.3994	0.35476	0.27063	0.26071	0.20816	0.17937	0.31349	0.24762	0.36548	0.41905	0.36905	0.37698	0.34524	0.30417	0.37302	0.38492	0.38889	0.39683	0.07738	0.09673	0.19626	0.23899	0.03274	0	0.04464	0.07827	0.2625
L2-E4d6	0.4246	0.39683	0.30417	0.31607	0.37857	0.39286	0.41429	0.41726	0.38155	0.29246	0.29246	0.23367	0.18532	0.28968	0.27738	0.40119	0.45476	0.36905	0.37698	0.34524	0.33393	0.37302	0.38492	0.38889	0.42857	0.0744	0.08185	0.19626	0.24792	0.04167	0.04464	0	0.09315	0.29226
L2-E4c6	0.40317	0.39127	0.29762	0.34524	0.3869	0.43095	0.4256	0.44048	0.40179	0.29484	0.28492	0.23776	0.21349	0.32778	0.29167	0.40952	0.4631	0.41508	0.42302	0.39127	0.34821	0.41905	0.43095	0.43492	0.45079	0.12589	0.13333	0.23265	0.25794	0.06935	0.07827	0.09315	0	0.21217
L2-E4d4	0.52937	0.49762	0.43869	0.47143	0.48929	0.53333	0.46845	0.48333	0.48631	0.39921	0.38333	0.33333	0.39524	0.5254	0.41786	0.55357	0.51786	0.60079	0.59286	0.56905	0.50714	0.57302	0.56905	0.58889	0.58095	0.26696	0.26845	0.33673	0.31799	0.2625	0.2625	0.29226	0.21217	0

## Sheet: Average distances
	Avg-E4d4	Avg-E4c3	Avg-E4c5	Avg-E4c4	Avg-E4d5	Avg-E4d3	Avg-E5b5	Avg-E4d8	Avg-E4c9	Avg-E4d9	Avg-E4c7	Avg-E4d7	Avg-E5b6	Avg-E5b7	Avg-E4b7	Avg-E5a6	Avg-E5a5	Avg-E4c8	Avg-E5a7	Avg-E4c6	Avg-E4d6	Avg-E4b5	Avg-E4b3	Avg-E4b4	Avg-E5b8	Avg-E5a8	Avg-E5b9	Avg-E4b8	Avg-E5a9	Avg-E5a3	Avg-E5a4	Avg-E4b6	Avg-E5b3	Avg-E5b4
Avg-E4d4	0	0.16577	0.16577	0.1752	0.12668	0.14286	0.40903	0.40431	0.39488	0.39488	0.47035	0.45148	0.47035	0.42318	0.4279	0.29447	0.32345	0.31087	0.30458	0.40532	0.40532	0.39892	0.39578	0.4115	0.44677	0.49865	0.44744	0.41375	0.38544	0.36051	0.36287	0.43037	0.43037	0.43666
Avg-E4c3	0.16577	0	0.01572	0.16487	0.27965	0.30166	0.34232	0.3093	0.32817	0.32817	0.34704	0.32817	0.40364	0.37534	0.36119	0.18767	0.2646	0.23001	0.23315	0.36927	0.36927	0.39353	0.34007	0.33693	0.44609	0.40364	0.57412	0.42722	0.40836	0.34805	0.36456	0.43441	0.4973	0.50045
Avg-E4c5	0.16577	0.01572	0	0.16015	0.28279	0.3111	0.3376	0.30458	0.32345	0.32345	0.36119	0.34232	0.39892	0.37062	0.35647	0.19003	0.26146	0.22686	0.22686	0.36691	0.36691	0.39982	0.34322	0.34007	0.46496	0.41779	0.59299	0.44609	0.41307	0.35512	0.37163	0.4407	0.50359	0.50674
Avg-E4c4	0.1752	0.16487	0.16015	0	0.15684	0.19575	0.48518	0.46159	0.47102	0.47102	0.52763	0.50876	0.5465	0.51819	0.50404	0.31873	0.38544	0.36972	0.37601	0.52628	0.52628	0.53639	0.5018	0.49865	0.59838	0.58423	0.71698	0.57951	0.53706	0.47204	0.49326	0.56469	0.62129	0.64016
Avg-E4d5	0.12668	0.27965	0.28279	0.15684	0	0.05071	0.55121	0.5748	0.55593	0.55593	0.5748	0.59367	0.51819	0.50876	0.52291	0.40364	0.46406	0.48293	0.48293	0.46968	0.46968	0.48607	0.47664	0.49236	0.53706	0.58423	0.5	0.51819	0.49933	0.38713	0.38241	0.46721	0.47035	0.49865
Avg-E4d3	0.14286	0.30166	0.3111	0.19575	0.05071	0	0.55121	0.53706	0.51819	0.51819	0.53706	0.55593	0.51819	0.47102	0.48518	0.46968	0.5301	0.51438	0.51438	0.45317	0.45317	0.4735	0.45777	0.4735	0.51819	0.5465	0.50943	0.58895	0.57008	0.44845	0.43902	0.52695	0.49865	0.50809
Avg-E5b5	0.40903	0.34232	0.3376	0.48518	0.55121	0.55121	0	0.04245	0.03302	0.03302	0.10849	0.08962	0.06132	0.08962	0.06604	0.19474	0.10916	0.1186	0.10916	0.33154	0.34097	0.30728	0.26011	0.22709	0.24528	0.16509	0.35445	0.43396	0.5	0.43531	0.45418	0.35916	0.34973	0.35916
Avg-E4d8	0.40431	0.3093	0.30458	0.46159	0.5748	0.53706	0.04245	0	0.01887	0.01887	0.06604	0.04717	0.09434	0.06604	0.05189	0.2372	0.15162	0.08558	0.09501	0.28908	0.31267	0.26482	0.21765	0.18464	0.20283	0.12264	0.36388	0.39151	0.45755	0.47776	0.4872	0.40162	0.37332	0.35445
Avg-E4c9	0.39488	0.32817	0.32345	0.47102	0.55593	0.51819	0.03302	0.01887	0	0	0.07547	0.0566	0.07547	0.0566	0.03302	0.22776	0.14218	0.10445	0.09501	0.29852	0.3221	0.27426	0.22709	0.19407	0.21226	0.13208	0.37332	0.40094	0.46698	0.46833	0.48248	0.39218	0.36388	0.36388
Avg-E4d9	0.39488	0.32817	0.32345	0.47102	0.55593	0.51819	0.03302	0.01887	0	0	0.07547	0.0566	0.07547	0.0566	0.03302	0.22776	0.14218	0.10445	0.09501	0.29852	0.3221	0.27426	0.22709	0.19407	0.21226	0.13208	0.37332	0.40094	0.46698	0.46833	0.48248	0.39218	0.36388	0.36388
Avg-E4c7	0.47035	0.34704	0.36119	0.52763	0.5748	0.53706	0.10849	0.06604	0.07547	0.07547	0	0.01887	0.09434	0.06604	0.05189	0.30323	0.21765	0.15162	0.16105	0.22305	0.24663	0.19879	0.15162	0.1186	0.13679	0.0566	0.39218	0.32547	0.39151	0.44003	0.42116	0.40633	0.30728	0.28841
Avg-E4d7	0.45148	0.32817	0.34232	0.50876	0.59367	0.55593	0.08962	0.04717	0.0566	0.0566	0.01887	0	0.11321	0.08491	0.07075	0.28437	0.19879	0.13275	0.14218	0.24191	0.2655	0.21765	0.17049	0.13747	0.15566	0.07547	0.39218	0.34434	0.41038	0.45889	0.44003	0.4252	0.32615	0.30728
Avg-E5b6	0.47035	0.40364	0.39892	0.5465	0.51819	0.51819	0.06132	0.09434	0.07547	0.07547	0.09434	0.11321	0	0.0566	0.04245	0.22776	0.17049	0.17992	0.17049	0.27493	0.27965	0.27426	0.22709	0.19407	0.21226	0.13208	0.44879	0.40094	0.46698	0.40701	0.40701	0.3686	0.28841	0.29784
Avg-E5b7	0.42318	0.37534	0.37062	0.51819	0.50876	0.47102	0.08962	0.06604	0.0566	0.0566	0.06604	0.08491	0.0566	0	0.02358	0.28437	0.19879	0.15162	0.14218	0.26078	0.27493	0.21765	0.17049	0.13747	0.15566	0.07547	0.47709	0.34434	0.41038	0.43531	0.43531	0.3969	0.31671	0.30728
Avg-E4b7	0.4279	0.36119	0.35647	0.50404	0.52291	0.48518	0.06604	0.05189	0.03302	0.03302	0.05189	0.07075	0.04245	0.02358	0	0.26078	0.1752	0.13747	0.12803	0.2655	0.28908	0.24124	0.19407	0.16105	0.17925	0.09906	0.43935	0.36792	0.43396	0.44946	0.44946	0.41105	0.33086	0.33086
Avg-E5a6	0.29447	0.18767	0.19003	0.31873	0.40364	0.46968	0.19474	0.2372	0.22776	0.22776	0.30323	0.28437	0.22776	0.28437	0.26078	0	0.0903	0.13118	0.12174	0.33962	0.33962	0.44564	0.50539	0.50854	0.35512	0.35984	0.42183	0.29852	0.25606	0.16509	0.1934	0.24438	0.29784	0.32615
Avg-E5a5	0.32345	0.2646	0.26146	0.38544	0.46406	0.5301	0.10916	0.15162	0.14218	0.14218	0.21765	0.19879	0.17049	0.19879	0.1752	0.0903	0	0.06289	0.05031	0.34501	0.36703	0.40881	0.46855	0.4717	0.30728	0.27426	0.3504	0.24596	0.17992	0.28527	0.30728	0.20755	0.26101	0.28931
Avg-E4c8	0.31087	0.23001	0.22686	0.36972	0.48293	0.51438	0.1186	0.08558	0.10445	0.10445	0.15162	0.13275	0.17992	0.15162	0.13747	0.13118	0.06289	0	0.01258	0.28212	0.31357	0.43396	0.49371	0.49686	0.24124	0.20822	0.40701	0.22237	0.22709	0.31042	0.33243	0.2327	0.28616	0.31447
Avg-E5a7	0.30458	0.23315	0.22686	0.37601	0.48293	0.51438	0.10916	0.09501	0.09501	0.09501	0.16105	0.14218	0.17049	0.14218	0.12803	0.12174	0.05031	0.01258	0	0.2947	0.32615	0.43396	0.49371	0.49686	0.26011	0.21765	0.40701	0.24124	0.21765	0.31042	0.33243	0.2327	0.28616	0.31447
Avg-E4c6	0.40532	0.36927	0.36691	0.52628	0.46968	0.45317	0.33154	0.28908	0.29852	0.29852	0.22305	0.24191	0.27493	0.26078	0.2655	0.33962	0.34501	0.28212	0.2947	0	0.02358	0.18149	0.19093	0.18778	0.22776	0.18531	0.40296	0.3504	0.41644	0.17453	0.15566	0.21923	0.15948	0.14376
Avg-E4d6	0.40532	0.36927	0.36691	0.52628	0.46968	0.45317	0.34097	0.31267	0.3221	0.3221	0.24663	0.2655	0.27965	0.27493	0.28908	0.33962	0.36703	0.31357	0.32615	0.02358	0	0.20979	0.20665	0.19093	0.27022	0.19946	0.36523	0.35512	0.42116	0.17453	0.15566	0.22237	0.16262	0.1469
Avg-E4b5	0.39892	0.39353	0.39982	0.53639	0.48607	0.4735	0.30728	0.26482	0.27426	0.27426	0.19879	0.21765	0.27426	0.21765	0.24124	0.44564	0.40881	0.43396	0.43396	0.18149	0.20979	0	0.05975	0.06289	0.0903	0.14218	0.38814	0.26954	0.33558	0.26011	0.23181	0.20126	0.1478	0.1195
Avg-E4b3	0.39578	0.34007	0.34322	0.5018	0.47664	0.45777	0.26011	0.21765	0.22709	0.22709	0.15162	0.17049	0.22709	0.17049	0.19407	0.50539	0.46855	0.49371	0.49371	0.19093	0.20665	0.05975	0	0.04088	0.13747	0.09501	0.38814	0.31671	0.38275	0.31986	0.29155	0.26101	0.20755	0.17925
Avg-E4b4	0.4115	0.33693	0.34007	0.49865	0.49236	0.4735	0.22709	0.18464	0.19407	0.19407	0.1186	0.13747	0.19407	0.13747	0.16105	0.50854	0.4717	0.49686	0.49686	0.18778	0.19093	0.06289	0.04088	0	0.16105	0.0903	0.42588	0.34973	0.41577	0.323	0.2947	0.26415	0.21069	0.18239
Avg-E5b8	0.44677	0.44609	0.46496	0.59838	0.53706	0.51819	0.24528	0.20283	0.21226	0.21226	0.13679	0.15566	0.21226	0.15566	0.17925	0.35512	0.30728	0.24124	0.26011	0.22776	0.27022	0.0903	0.13747	0.16105	0	0.08019	0.32615	0.18868	0.25472	0.30323	0.28437	0.26954	0.17049	0.16105
Avg-E5a8	0.49865	0.40364	0.41779	0.58423	0.58423	0.5465	0.16509	0.12264	0.13208	0.13208	0.0566	0.07547	0.13208	0.07547	0.09906	0.35984	0.27426	0.20822	0.21765	0.18531	0.19946	0.14218	0.09501	0.0903	0.08019	0	0.32615	0.26887	0.33491	0.38342	0.36456	0.34973	0.25067	0.23181
Avg-E5b9	0.44744	0.57412	0.59299	0.71698	0.5	0.50943	0.35445	0.36388	0.37332	0.37332	0.39218	0.39218	0.44879	0.47709	0.43935	0.42183	0.3504	0.40701	0.40701	0.40296	0.36523	0.38814	0.38814	0.42588	0.32615	0.32615	0	0.15633	0.07143	0.26146	0.25202	0.14286	0.21833	0.22776
Avg-E4b8	0.41375	0.42722	0.44609	0.57951	0.51819	0.58895	0.43396	0.39151	0.40094	0.40094	0.32547	0.34434	0.40094	0.34434	0.36792	0.29852	0.24596	0.22237	0.24124	0.3504	0.35512	0.26954	0.31671	0.34973	0.18868	0.26887	0.15633	0	0.06604	0.19946	0.21833	0.1469	0.17049	0.17992
Avg-E5a9	0.38544	0.40836	0.41307	0.53706	0.49933	0.57008	0.5	0.45755	0.46698	0.46698	0.39151	0.41038	0.46698	0.41038	0.43396	0.25606	0.17992	0.22709	0.21765	0.41644	0.42116	0.33558	0.38275	0.41577	0.25472	0.33491	0.07143	0.06604	0	0.22776	0.2372	0.12803	0.22709	0.24596
Avg-E5a3	0.36051	0.34805	0.35512	0.47204	0.38713	0.44845	0.43531	0.47776	0.46833	0.46833	0.44003	0.45889	0.40701	0.43531	0.44946	0.16509	0.28527	0.31042	0.31042	0.17453	0.17453	0.26011	0.31986	0.323	0.30323	0.38342	0.26146	0.19946	0.22776	0	0.03302	0.10288	0.11231	0.14061
Avg-E5a4	0.36287	0.36456	0.37163	0.49326	0.38241	0.43902	0.45418	0.4872	0.48248	0.48248	0.42116	0.44003	0.40701	0.43531	0.44946	0.1934	0.30728	0.33243	0.33243	0.15566	0.15566	0.23181	0.29155	0.2947	0.28437	0.36456	0.25202	0.21833	0.2372	0.03302	0	0.09973	0.11545	0.11231
Avg-E4b6	0.43037	0.43441	0.4407	0.56469	0.46721	0.52695	0.35916	0.40162	0.39218	0.39218	0.40633	0.4252	0.3686	0.3969	0.41105	0.24438	0.20755	0.2327	0.2327	0.21923	0.22237	0.20126	0.26101	0.26415	0.26954	0.34973	0.14286	0.1469	0.12803	0.10288	0.09973	0	0.07862	0.08176
Avg-E5b3	0.43037	0.4973	0.50359	0.62129	0.47035	0.49865	0.34973	0.37332	0.36388	0.36388	0.30728	0.32615	0.28841	0.31671	0.33086	0.29784	0.26101	0.28616	0.28616	0.15948	0.16262	0.1478	0.20755	0.21069	0.17049	0.25067	0.21833	0.17049	0.22709	0.11231	0.11545	0.07862	0	0.0283
Avg-E5b4	0.43666	0.50045	0.50674	0.64016	0.49865	0.50809	0.35916	0.35445	0.36388	0.36388	0.28841	0.30728	0.29784	0.30728	0.33086	0.32615	0.28931	0.31447	0.31447	0.14376	0.1469	0.1195	0.17925	0.18239	0.16105	0.23181	0.22776	0.17992	0.24596	0.14061	0.11231	0.08176	0.0283	0

## Sheet: Limb#1 vs. #2 distances
	L2-E4b3	L2-E4b4	L2-E4b5	L2-E4b6	L2-E4b7	L2-E4b8	L2-E4c3	L2-E4c4	L2-E4c5	L2-E4c6	L2-E4c7	L2-E4c8	L2-E4c9	L2-E4d3	L2-E4d4	L2-E4d5	L2-E4d6	L2-E4d7	L2-E4d8	L2-E4d9	L2-E5a3	L2-E5a4	L2-E5a5	L2-E5a6	L2-E5a7	L2-E5a8	L2-E5a9	L2-E5b3	L2-E5b4	L2-E5b5	L2-E5b6	L2-E5b7	L2-E5b8	L2-E5b9
L1-E4b3	0.06753	0.0727	0.20201	0.23305	0.26408	0.23276	0.34282	0.32241	0.30172	0.26552	0.27586	0.24885	0.3158	0.32787	0.26552	0.33276	0.28621	0.20805	0.30575	0.2954	0.24856	0.21782	0.23851	0.32644	0.23333	0.33678	0.26408	0.16063	0.15029	0.27443	0.26408	0.25374	0.17586	0.30517
L1-E4b4	0.0796	0.06925	0.16236	0.20718	0.20374	0.15575	0.26983	0.27011	0.19253	0.18218	0.18477	0.18879	0.23822	0.26782	0.23908	0.23908	0.20805	0.12471	0.25086	0.24569	0.19339	0.08534	0.19138	0.23276	0.18879	0.25086	0.10718	0.14511	0.13822	0.24167	0.16236	0.19684	0.2023	0.22816
L1-E4b5	0.11925	0.0727	0.13994	0.17098	0.20201	0.19138	0.35833	0.38448	0.30172	0.29655	0.28621	0.18678	0.25891	0.35891	0.32759	0.33276	0.31724	0.18218	0.2592	0.2954	0.18649	0.15575	0.17644	0.26437	0.17126	0.27471	0.24339	0.09856	0.08822	0.21753	0.26408	0.25374	0.17586	0.2431
L1-E4b6	0.24339	0.19684	0.10891	0.08822	0.11925	0.19138	0.31178	0.38448	0.38966	0.39483	0.41034	0.11437	0.13477	0.43649	0.34828	0.33793	0.41552	0.30632	0.13506	0.17644	0.12443	0.13506	0.11437	0.14023	0.11437	0.15057	0.24339	0.10891	0.11925	0.09339	0.24339	0.16063	0.17586	0.11897
L1-E4b7	0.05718	0.1296	0.25374	0.29511	0.31063	0.04655	0.3273	0.31207	0.28103	0.29655	0.29138	0.24885	0.25374	0.35374	0.27069	0.28621	0.30172	0.2908	0.25402	0.23333	0.33132	0.26437	0.26437	0.27471	0.25402	0.24885	0.07787	0.21236	0.20201	0.26408	0.16063	0.2227	0.06207	0.11897
L1-E4b8	0.2796	0.20718	0.08305	0.05201	0.09856	0.2069	0.24971	0.37414	0.40517	0.37931	0.38448	0.09885	0.10891	0.35891	0.34828	0.35862	0.38448	0.2908	0.16092	0.21264	0.08305	0.15575	0.1454	0.1092	0.12471	0.13506	0.25374	0.12443	0.13477	0.10891	0.26925	0.19684	0.31552	0.13448
L1-E4c3	0.26006	0.30489	0.30144	0.33937	0.33592	0.3431	0.09635	0.04526	0.10603	0.0944	0.11897	0.31667	0.32902	0.18003	0.06336	0.03879	0.0931	0.23161	0.23391	0.24425	0.33247	0.31149	0.3296	0.25718	0.33736	0.24425	0.29799	0.36006	0.36695	0.33247	0.31868	0.32902	0.35862	0.29138
L1-E4c4	0.26695	0.31523	0.30144	0.34626	0.33937	0.3431	0.10374	0.05172	0.12543	0.11379	0.13836	0.30374	0.33592	0.18908	0.06983	0.05819	0.1125	0.2454	0.23649	0.25977	0.33592	0.32443	0.32443	0.24425	0.32443	0.23132	0.32213	0.35661	0.36351	0.33247	0.33247	0.34282	0.36379	0.27069
L1-E4c5	0.25661	0.30833	0.30489	0.34282	0.33247	0.3431	0.10226	0.04138	0.10733	0.09569	0.12026	0.32184	0.33247	0.18908	0.06983	0.04009	0.0944	0.24023	0.23908	0.25201	0.32902	0.32184	0.33477	0.26236	0.34253	0.24943	0.30833	0.36351	0.3704	0.33247	0.32902	0.33937	0.35862	0.29138
L1-E4c6	0.31178	0.29799	0.26695	0.2704	0.26695	0.33793	0.22787	0.13707	0.06595	0.06983	0.0556	0.24425	0.27385	0.21624	0.15517	0.12026	0.08147	0.13678	0.2908	0.23908	0.2704	0.22356	0.24684	0.28822	0.24425	0.30632	0.27385	0.2773	0.2704	0.2704	0.2773	0.29454	0.3069	0.37931
L1-E4c7	0.54167	0.48994	0.38305	0.33822	0.30029	0.16092	0.275	0.28046	0.18994	0.20546	0.17701	0.30259	0.25891	0.28851	0.24943	0.24943	0.22874	0.13247	0.21983	0.15776	0.31753	0.26638	0.33103	0.2431	0.32328	0.23017	0.10374	0.40029	0.40718	0.27615	0.14511	0.21063	0.17644	0.23333
L1-E4c8	0.42098	0.36925	0.26236	0.22443	0.22787	0.17644	0.19741	0.22098	0.2158	0.2158	0.23132	0.20948	0.19339	0.30402	0.23649	0.20546	0.26236	0.19971	0.1319	0.10603	0.23822	0.17845	0.23793	0.15	0.23017	0.13707	0.11063	0.2796	0.28649	0.18994	0.11063	0.16925	0.19195	0.11437
L1-E4c9	0.07787	0.15029	0.27443	0.3158	0.28994	0.06724	0.30661	0.29138	0.27586	0.28621	0.31207	0.26954	0.23305	0.37443	0.29138	0.26552	0.32241	0.31149	0.23333	0.21264	0.31063	0.28506	0.28506	0.25402	0.27471	0.22816	0.09856	0.23305	0.2227	0.24339	0.13994	0.20201	0.08276	0.13966
L1-E4d3	0.51695	0.5204	0.60661	0.60316	0.57213	0.51034	0.37147	0.35862	0.31983	0.32888	0.3069	0.51236	0.55144	0.25431	0.32112	0.37026	0.33017	0.37299	0.56667	0.53305	0.57557	0.51494	0.52011	0.52011	0.50718	0.52529	0.46523	0.56868	0.56178	0.58592	0.55144	0.56178	0.59828	0.56207
L1-E4d4	0.44052	0.43707	0.475	0.46466	0.45086	0.43218	0.24823	0.23003	0.23003	0.23132	0.22486	0.40833	0.43362	0.21236	0.23261	0.24167	0.25848	0.29138	0.41092	0.40575	0.45431	0.42902	0.43937	0.39799	0.42385	0.40057	0.40603	0.48534	0.47845	0.46466	0.42328	0.48534	0.52011	0.4477
L1-E4d5	0.36063	0.35718	0.40546	0.40201	0.40546	0.35402	0.19298	0.19713	0.20359	0.19713	0.18807	0.31207	0.38822	0.10489	0.1454	0.20359	0.2217	0.21149	0.35345	0.36897	0.40201	0.32759	0.32759	0.31207	0.31724	0.31207	0.32615	0.38477	0.38822	0.39511	0.36408	0.39511	0.43161	0.3592
L1-E4d6	0.32557	0.31868	0.2773	0.26006	0.25661	0.36897	0.21162	0.11509	0.05948	0.06853	0.06466	0.24425	0.26351	0.2046	0.13319	0.09828	0.05948	0.16092	0.28046	0.22874	0.26006	0.24167	0.24684	0.28822	0.24425	0.30115	0.28075	0.2773	0.2704	0.26006	0.30144	0.28075	0.31207	0.39483
L1-E4d7	0.52098	0.46925	0.36236	0.31753	0.2796	0.17644	0.26466	0.27011	0.18218	0.18994	0.19253	0.29224	0.23822	0.28333	0.2546	0.23908	0.23391	0.14799	0.20948	0.14741	0.29684	0.25086	0.32069	0.23276	0.31293	0.21983	0.10374	0.3796	0.38649	0.25546	0.13477	0.18994	0.19195	0.24368
L1-E4d8	0.44511	0.39339	0.28649	0.24167	0.21408	0.16609	0.19224	0.19511	0.21063	0.20287	0.22615	0.18879	0.1727	0.32471	0.22874	0.17701	0.23649	0.24109	0.10603	0.09052	0.22787	0.23534	0.21724	0.12931	0.20948	0.11638	0.12787	0.30374	0.31063	0.1796	0.16925	0.1796	0.18161	0.14023
L1-E4d9	0.49339	0.44167	0.33477	0.28994	0.25201	0.15057	0.23879	0.24425	0.18218	0.20546	0.20805	0.26638	0.21063	0.27299	0.23391	0.22874	0.24425	0.16351	0.18362	0.12155	0.26925	0.23017	0.29483	0.2069	0.28707	0.19397	0.08305	0.35201	0.35891	0.22787	0.11063	0.16236	0.16609	0.20747
L1-E5a3	0.25546	0.20374	0.13477	0.09684	0.11408	0.24885	0.21293	0.31925	0.3477	0.33736	0.33477	0.03362	0.10718	0.31954	0.24425	0.29598	0.35029	0.21264	0.06983	0.1319	0.11063	0.12672	0.04138	0.04655	0.03362	0.05948	0.24167	0.11408	0.12098	0.10374	0.22787	0.15546	0.23333	0.19195
L1-E5a4	0.23477	0.18305	0.13132	0.09339	0.11063	0.24885	0.23362	0.33477	0.33736	0.32701	0.32443	0.03879	0.12443	0.31437	0.25718	0.30115	0.33736	0.19195	0.09052	0.15259	0.10718	0.12155	0.02586	0.06724	0.02845	0.08017	0.24856	0.09339	0.10029	0.10718	0.24511	0.1727	0.23333	0.21782
L1-E5a5	0.40718	0.35546	0.24856	0.20374	0.1796	0.19713	0.16121	0.17701	0.24425	0.23649	0.25977	0.15517	0.14511	0.32989	0.22356	0.19253	0.27011	0.27471	0.07241	0.07241	0.18994	0.21207	0.18362	0.09569	0.17586	0.08276	0.15546	0.2658	0.2727	0.14856	0.14167	0.15201	0.18161	0.14023
L1-E5a6	0.38305	0.33132	0.23132	0.18994	0.18649	0.19713	0.15862	0.20546	0.2727	0.26494	0.28822	0.12672	0.15201	0.32213	0.21839	0.20546	0.29856	0.2773	0.05431	0.09052	0.19684	0.20431	0.15517	0.06724	0.14741	0.05431	0.17615	0.24167	0.24856	0.14856	0.14856	0.15891	0.17126	0.12471
L1-E5a7	0.41753	0.3658	0.25891	0.21408	0.20029	0.16609	0.16897	0.19511	0.23649	0.22874	0.25201	0.16293	0.1658	0.32213	0.22615	0.18477	0.26236	0.25144	0.08017	0.09569	0.21063	0.21983	0.19138	0.10345	0.18362	0.09052	0.13477	0.27615	0.28305	0.16925	0.16236	0.1727	0.18161	0.1092
L1-E5a8	0.53132	0.4796	0.3727	0.32787	0.28994	0.16609	0.26207	0.26753	0.18994	0.19253	0.18477	0.28966	0.24856	0.24971	0.22615	0.23649	0.19511	0.14023	0.2069	0.14483	0.30718	0.26379	0.3181	0.23017	0.31034	0.21724	0.10029	0.38994	0.39684	0.2658	0.17615	0.21408	0.21264	0.22816
L1-E5a9	0.32098	0.24856	0.12443	0.08305	0.06753	0.24828	0.22902	0.33276	0.40517	0.38966	0.39483	0.14023	0.06753	0.36925	0.33793	0.33276	0.39483	0.33218	0.14023	0.17126	0.0727	0.19713	0.18678	0.09885	0.16609	0.12471	0.26408	0.1658	0.17615	0.06753	0.22787	0.15546	0.3569	0.17586
L1-E5b3	0.21753	0.17098	0.1658	0.14511	0.17615	0.13448	0.33764	0.42069	0.38966	0.39483	0.38448	0.09885	0.16063	0.3796	0.37414	0.39483	0.41552	0.28046	0.16092	0.2023	0.18132	0.15057	0.09885	0.16609	0.09368	0.17644	0.18649	0.09339	0.09339	0.13994	0.20718	0.18649	0.11897	0.14483
L1-E5b4	0.16552	0.11379	0.10345	0.06552	0.10345	0.17098	0.2977	0.40489	0.34282	0.33937	0.32557	0.0658	0.11724	0.31552	0.34971	0.36351	0.34282	0.20776	0.16236	0.20029	0.1	0.10029	0.06236	0.13477	0.05201	0.15546	0.32069	0.04483	0.03793	0.1	0.23793	0.16552	0.1658	0.20201
L1-E5b5	0.24339	0.23305	0.17098	0.20201	0.17098	0.15	0.24971	0.25517	0.3069	0.30172	0.32759	0.21782	0.11408	0.34339	0.28103	0.29138	0.33793	0.33218	0.19713	0.15575	0.18649	0.26437	0.26954	0.17644	0.24885	0.17644	0.11408	0.24339	0.25374	0.15546	0.18132	0.17098	0.22759	0.07759
L1-E5b6	0.32615	0.3158	0.25374	0.26408	0.23305	0.23276	0.26523	0.3069	0.3069	0.32241	0.32241	0.27989	0.17615	0.32787	0.31207	0.33793	0.36379	0.27011	0.2592	0.18678	0.24856	0.20747	0.33161	0.23851	0.31092	0.23851	0.08305	0.32615	0.33649	0.21753	0.09856	0.15029	0.28966	0.16034
L1-E5b7	0.30546	0.29511	0.23305	0.26408	0.25891	0.21207	0.29626	0.31724	0.27586	0.29138	0.29138	0.31092	0.20718	0.34856	0.31207	0.31724	0.3431	0.23908	0.29023	0.21782	0.25374	0.17644	0.34713	0.26954	0.34195	0.26954	0.06236	0.30546	0.3158	0.24856	0.11925	0.18132	0.32069	0.13966
L1-E5b8	0.14511	0.0727	0.13477	0.17615	0.23305	0.07241	0.37902	0.41034	0.33793	0.31207	0.29138	0.15057	0.24339	0.35891	0.35345	0.36897	0.31724	0.1977	0.2954	0.33678	0.21753	0.1454	0.1454	0.22816	0.14023	0.25402	0.12443	0.09339	0.08305	0.24339	0.2796	0.33132	0.18103	0.10345
L1-E5b9	0.34195	0.27989	0.21782	0.1454	0.09368	0.32098	0.27069	0.44684	0.50891	0.50891	0.48822	0.17672	0.08333	0.38506	0.38477	0.44684	0.47787	0.34282	0.2181	0.24914	0.11437	0.23879	0.20776	0.125	0.18707	0.16638	0.36264	0.18678	0.18678	0.11437	0.22816	0.17644	0.28994	0.32098
